# Supplementary material for: C1q/TNF-Related Protein-9 Ameliorates Ox-LDL-Induced Endothelial Dysfunction via PGC-1α/AMPK-Mediated Antioxidant Enzyme Induction
Source: Int J Mol Sci. 2017 May 26;18(6):1097. doi: 10.3390/ijms18061097 (PMC5485929; doi:10.3390/ijms18061097)
Supplement: Supplementary file 1 [file ijms-18-01097-s001.pdf]

**C1q/TNF-related protein-9 ameliorates ox-LDL-induced endothelial dysfunction via  
PGC-1 $\alpha$ /AMPK-mediated antioxidant enzyme induction**

Haijian Sun, Xuexue Zhu, Yuetao Zhou, Weiwei Cai, Liying Qiu

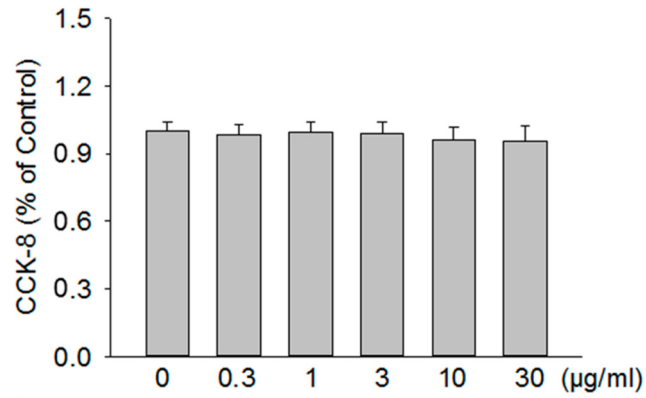

**Figure S1.** Effect of CTRP9 on the cytotoxicity in HUVECs. HUVECs were treated with CTRP9 at different doses (0, 0.3, 1, 3, 10, 30 µg/mL) for 24 h. Cell viability was measured by CCK-8 assay. Values were expressed as mean  $\pm$  SE.  $n = 6$  for each group.

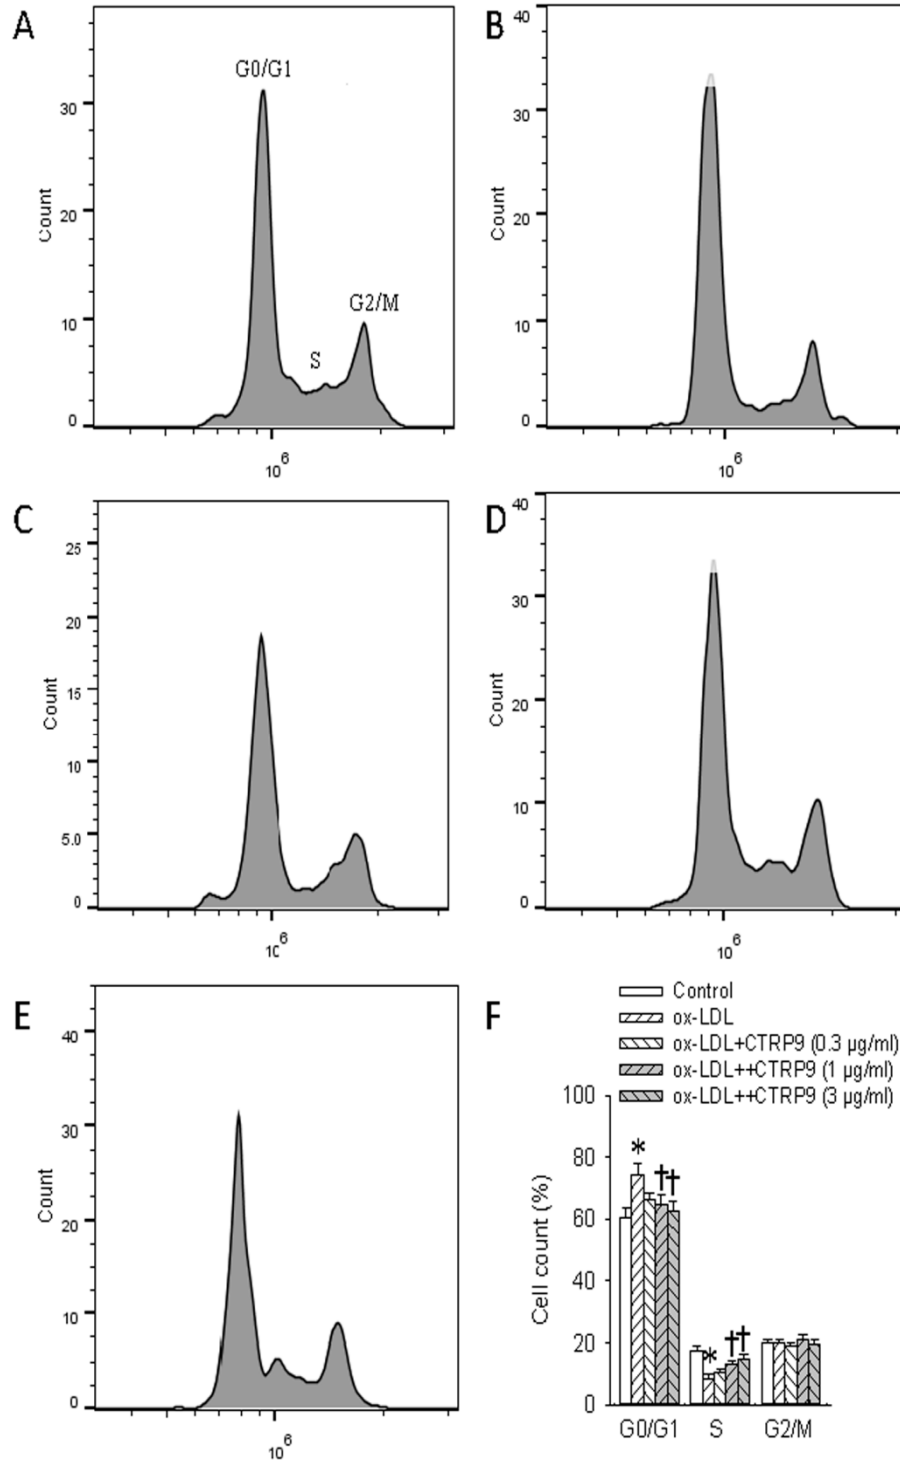

**Figure S2.** Effects of CTRP9 on the cell cycle in ox-LDL-stimulated HUVECs. HUVECs were pretreated with different doses of CTRP9 (0.1, 1 and 3  $\mu$ g/mL) for 6 h before ox-LDL (100  $\mu$ g/mL) incubation for another 24 h. (A) Control. (B) ox-LDL. (C) CTRP9 (0.3  $\mu$ g/mL) + ox-LDL. (D) CTRP9 (1  $\mu$ g/mL) + ox-LDL. (E) CTRP9 (3  $\mu$ g/mL) + ox-LDL. (F) The distribution of various phases in cell cycle evaluated with flow cytometry. Values are mean  $\pm$  SE. \*  $P < 0.05$  vs. Control, +  $P < 0.05$  vs. ox-LDL.  $n = 4$  for each group.

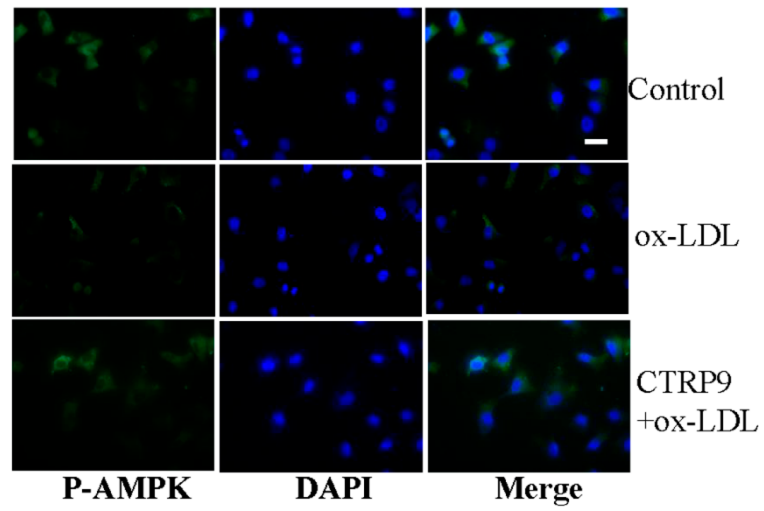

**Figure S3.** The phosphorylated AMPK was observed by immunofluorescence assay. Scale bar, 50  $\mu\text{m}$ .

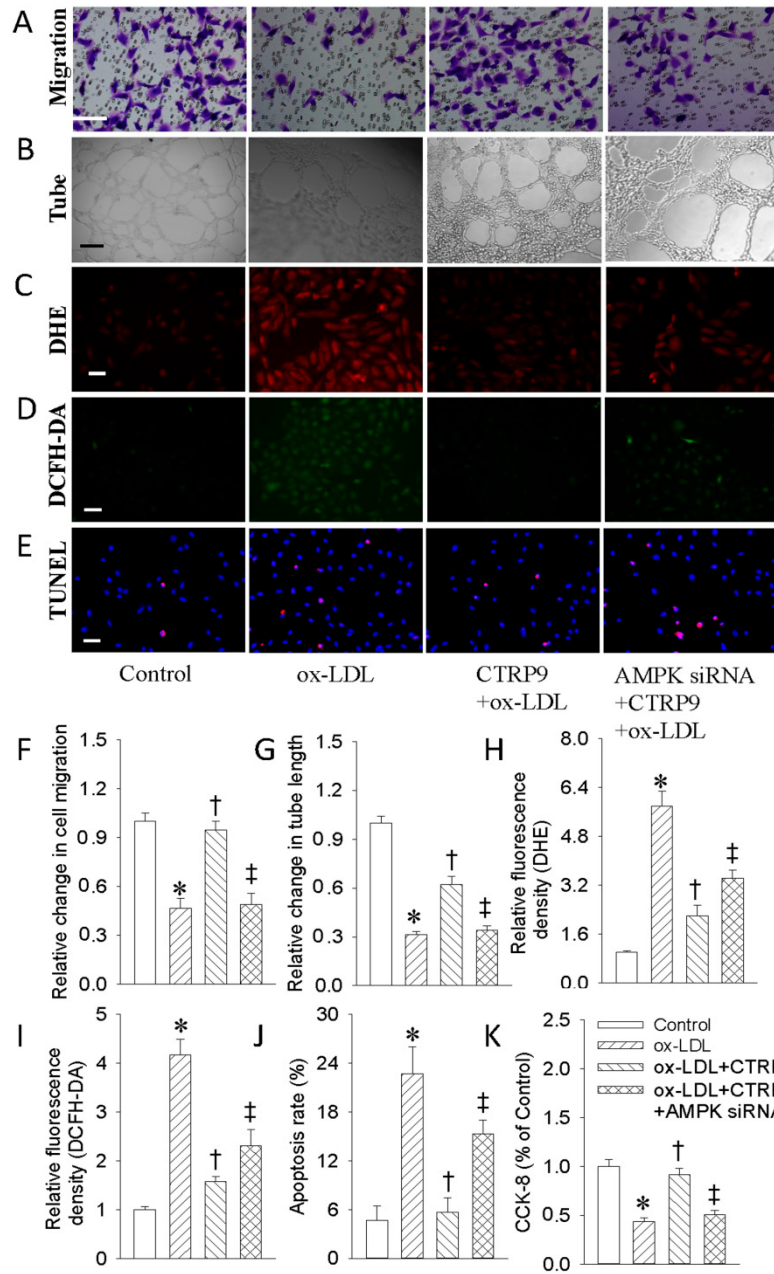

**Figure S4.** AMPK knockdown abolished antagonistic effects of CTRP9 on the proliferation, migration, angiogenesis, and apoptosis in ox-LDL-treated HUVECs. HUVECs were transfected with AMPK siRNA for 24 h, and then incubated with CTRP9 (3  $\mu\text{g/mL}$ ) for 6 h followed by ox-LDL (100  $\mu\text{g/mL}$ ) challenge for 24 h. (A,F) Transwell assays were performed to determine the migration of HUVECs. Scale bar, 100  $\mu\text{m}$ . (B,G) Matrigel angiogenesis assay in HUVECs. Scale bar, 200  $\mu\text{m}$ . (C,H) The levels of superoxide anions detected by DHE staining. Scale bar, 100  $\mu\text{m}$ . (D,I) The ROS levels measured by DCFH-DA. Scale bar, 100  $\mu\text{m}$ . (E,J) TUNEL-positive nuclei in red fluorescent color and total nuclei staining with DAPI. Scale bar, 100  $\mu\text{m}$ . (K) The cell viability was determined by CCK-8 test. Values are mean  $\pm$  SE. \*  $P < 0.05$  vs. Control, †  $P < 0.05$  vs. ox-LDL, ‡  $P < 0.05$  vs. ox-LDL+ CTRP9.  $n = 6$  for each group.

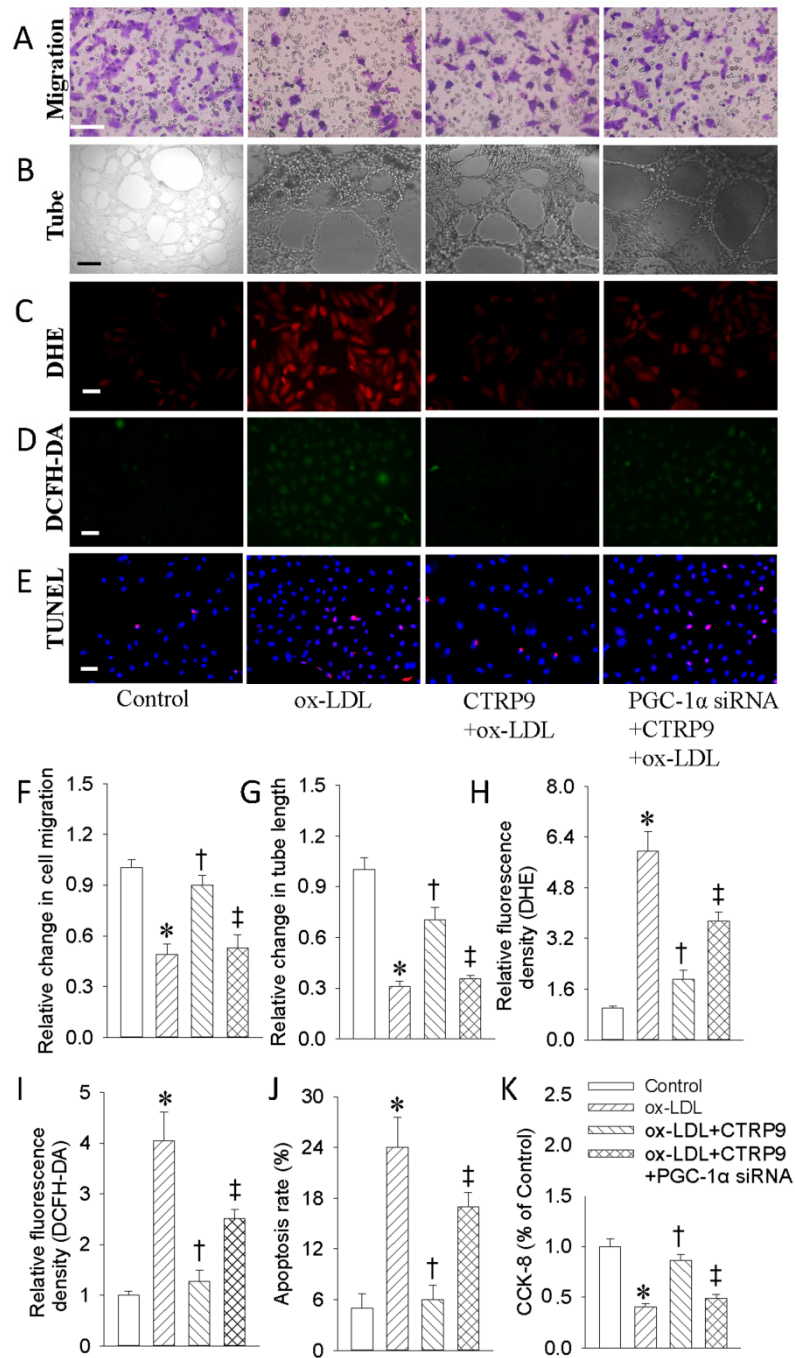

**Figure S5.** Silencing of PGC1- $\alpha$  prevented the protective actions of CTRP9 on the proliferation, migration, angiogenesis, and apoptosis in ox-LDL-treated HUVECs. HUVECs were transfected with PGC1- $\alpha$  siRNA for 24 h, and then incubated with CTRP9 (3  $\mu$ g/mL) for 6 h followed by ox-LDL (100  $\mu$ g/mL) challenge for 24 h. (A,F) Transwell assays were performed to determine the migration of HUVECs. Scale bar, 100  $\mu$ m. (B,G) Matrigel angiogenesis assay in HUVECs. Scale bar, 200  $\mu$ m. (C,H) The levels of superoxide anions detected by DHE staining. Scale bar, 100  $\mu$ m. (D,I) The ROS levels measured by DCFH-DA. Scale bar, 100  $\mu$ m. (E,J) TUNEL-positive nuclei in red fluorescent color and total nuclei staining with DAPI. Scale bar, 100  $\mu$ m. (K) The cell viability was determined by CCK-8 test. Values are mean  $\pm$  SE. \* $P$  < 0.05 vs. Control, †  $P$  < 0.05 vs. ox-LDL, ‡  $P$  < 0.05 vs. ox-LDL+CTRP9.  $n$  = 6 for each group.
